# Supplementary material
Source: PubMed Central journal article supplement (PMC6776064)

**a**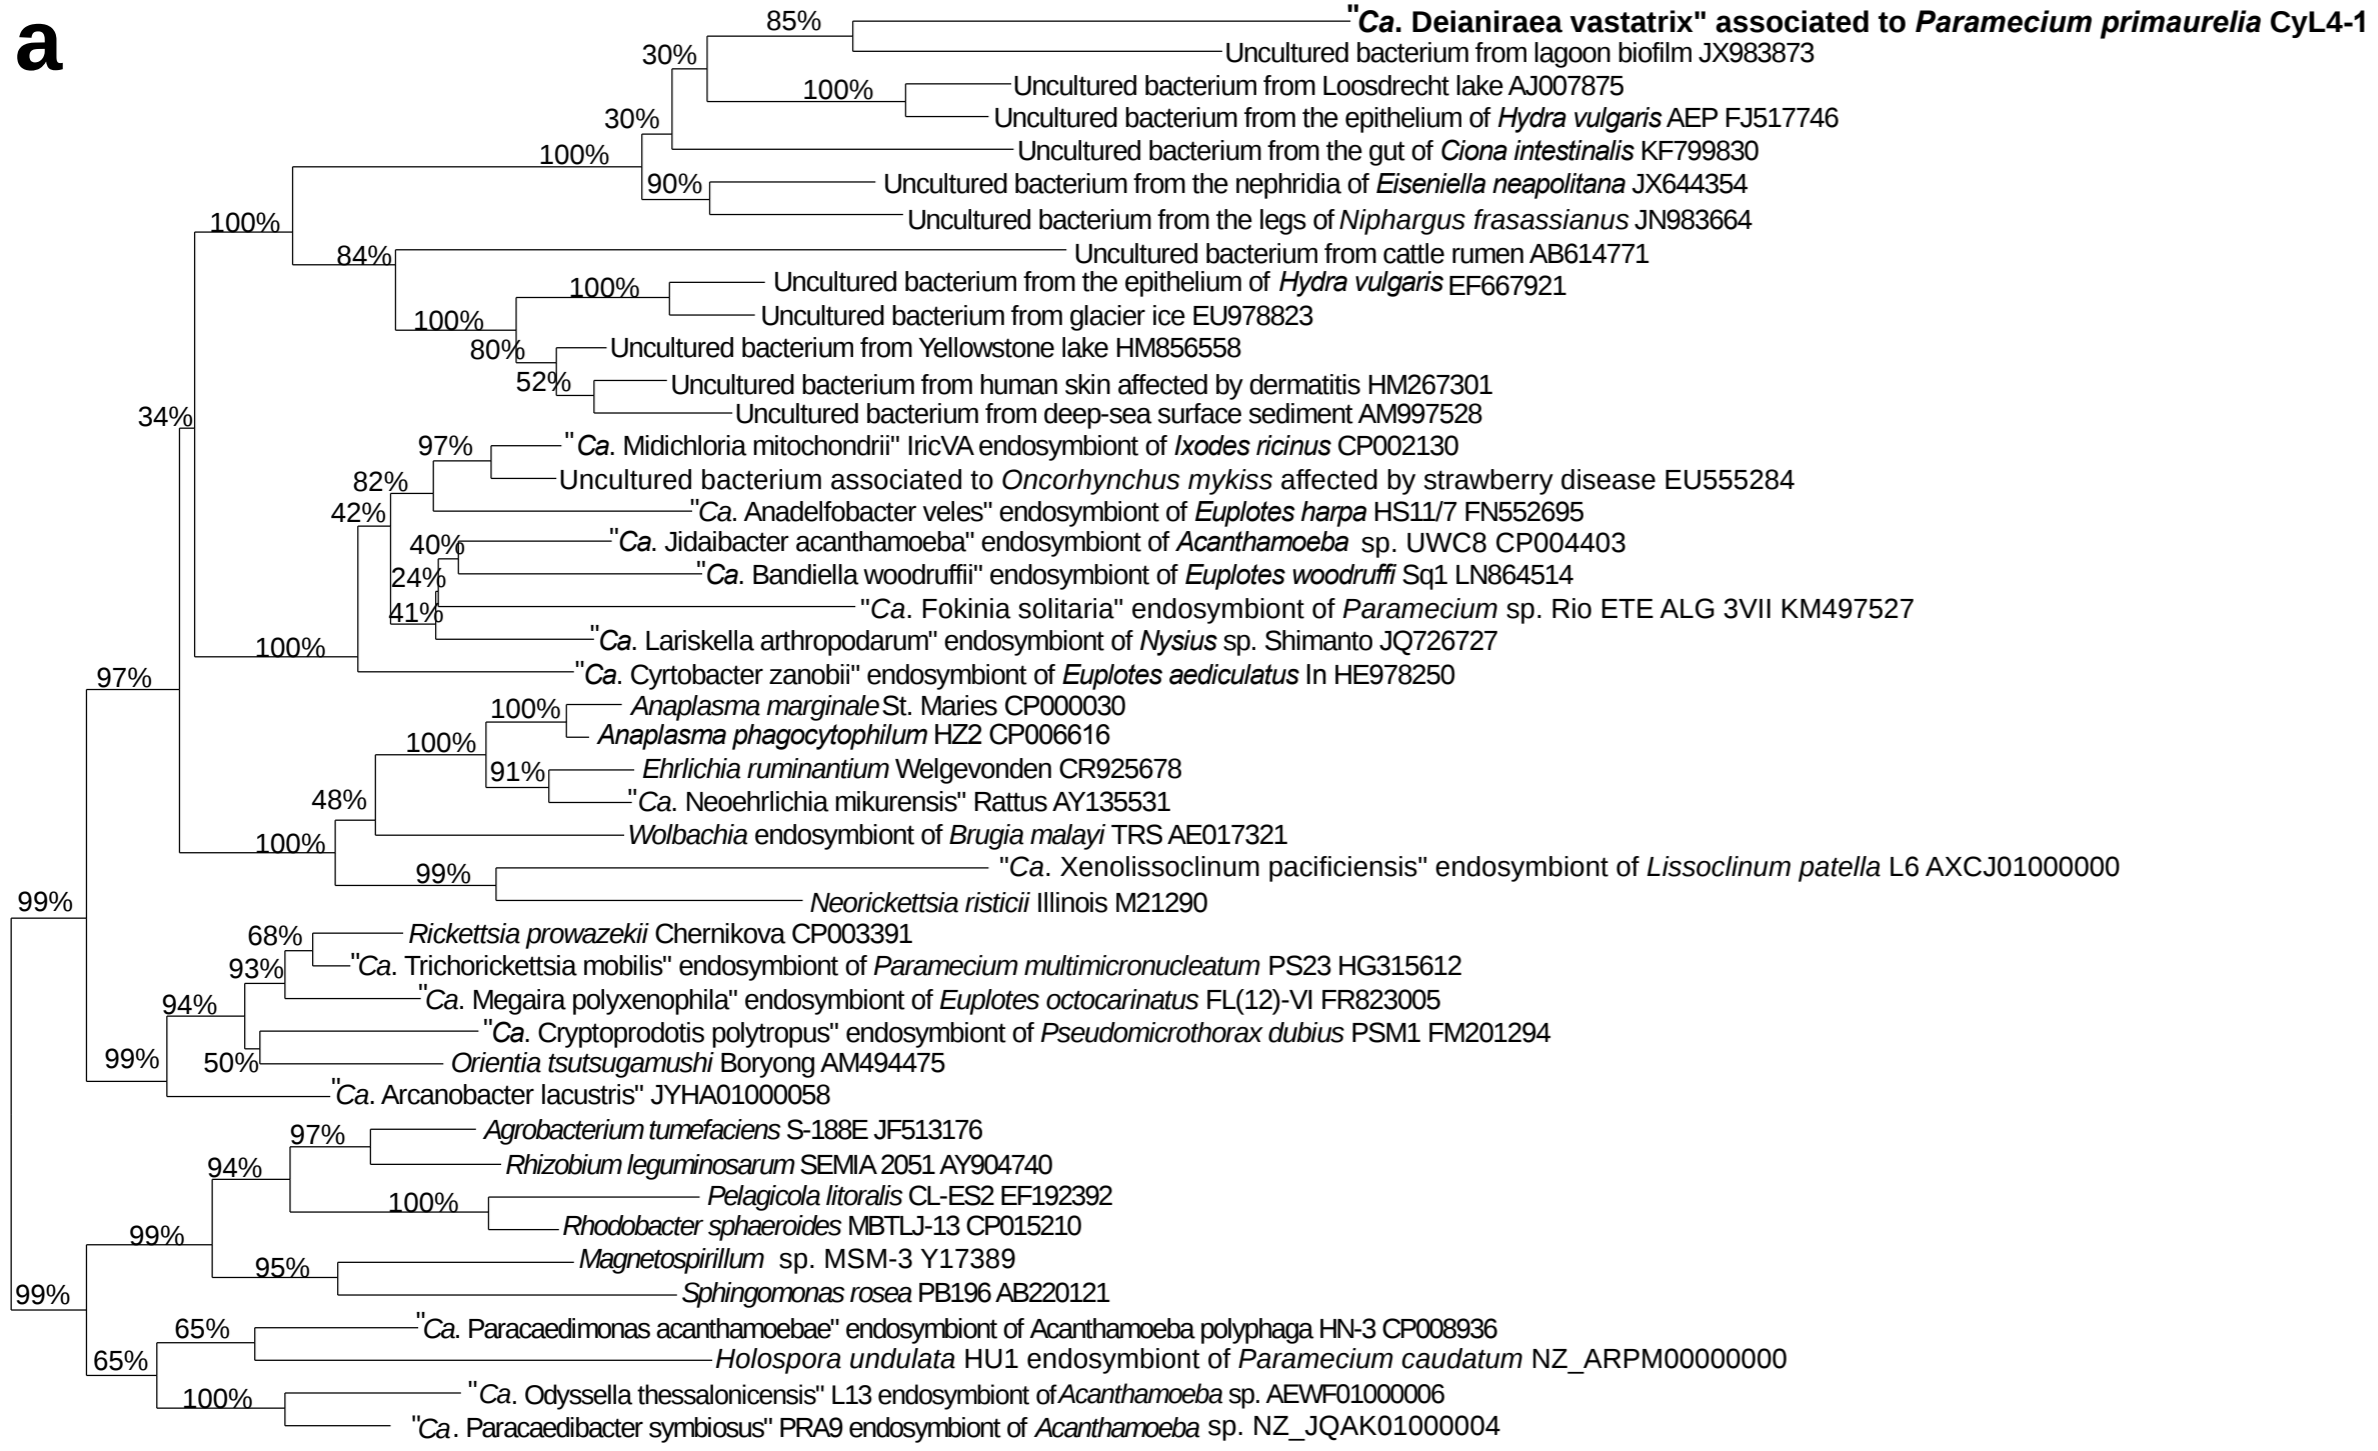**Subclade 1****Subclade 2****"Ca. Deianiraeaceae"****"Ca. Midichloriaceae"****Anaplasmataceae****Rickettsiaceae****other Alphaproteobacteria  
(outgroup)**

**b**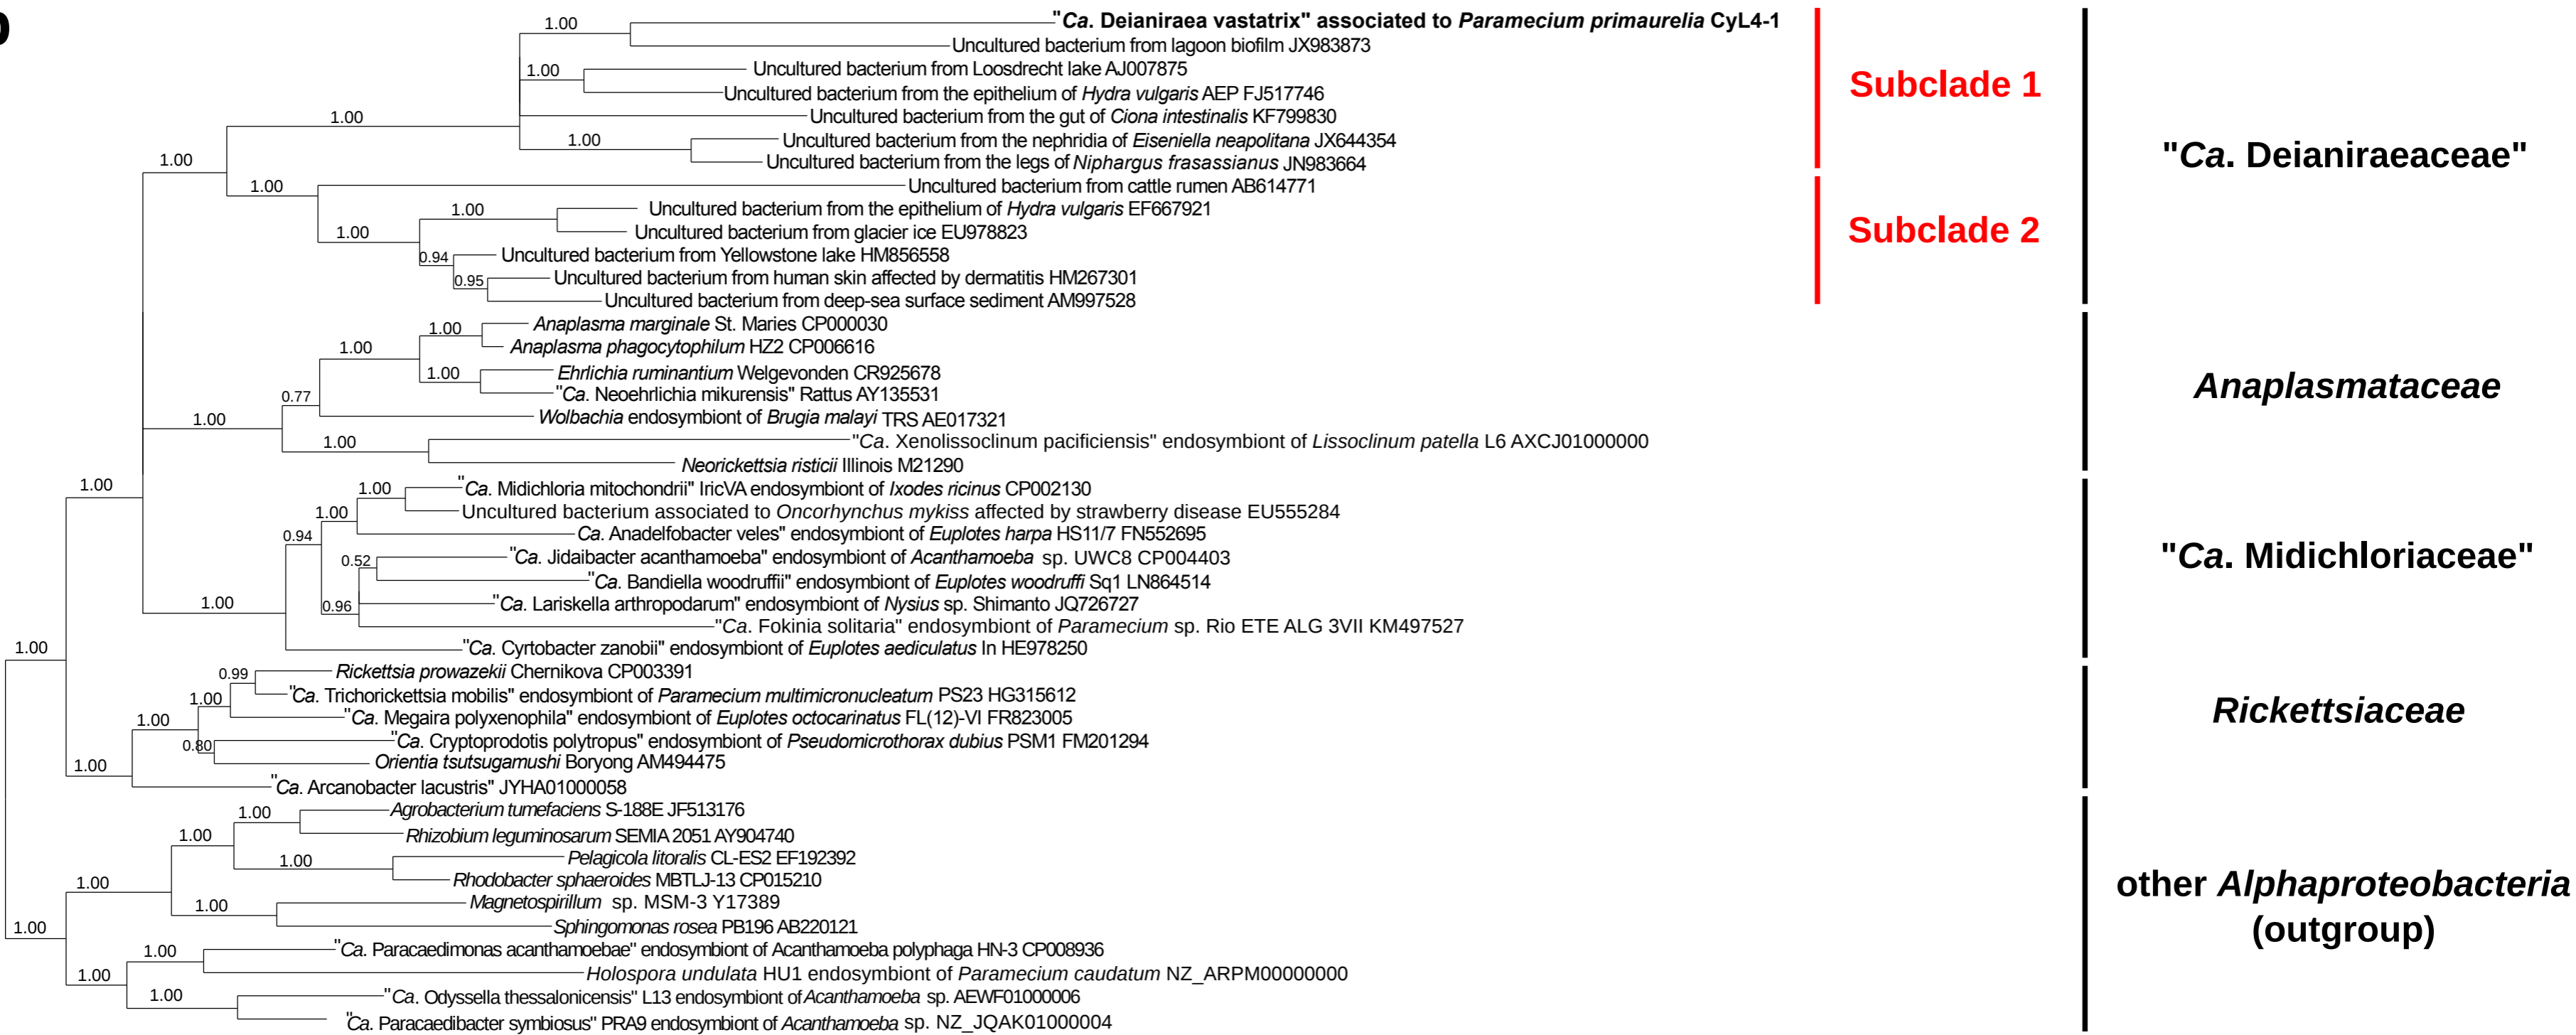

Supplement: 41396_2019_433_MOESM21_ESM.pdf [file 41396_2019_433_MOESM21_ESM.pdf]
