# Supplementary material
Source: PubMed Central journal article supplement (PMC6776064)
Supplement: 41396_2019_433_MOESM26_ESM.pdf [file 41396_2019_433_MOESM26_ESM.pdf]

**a**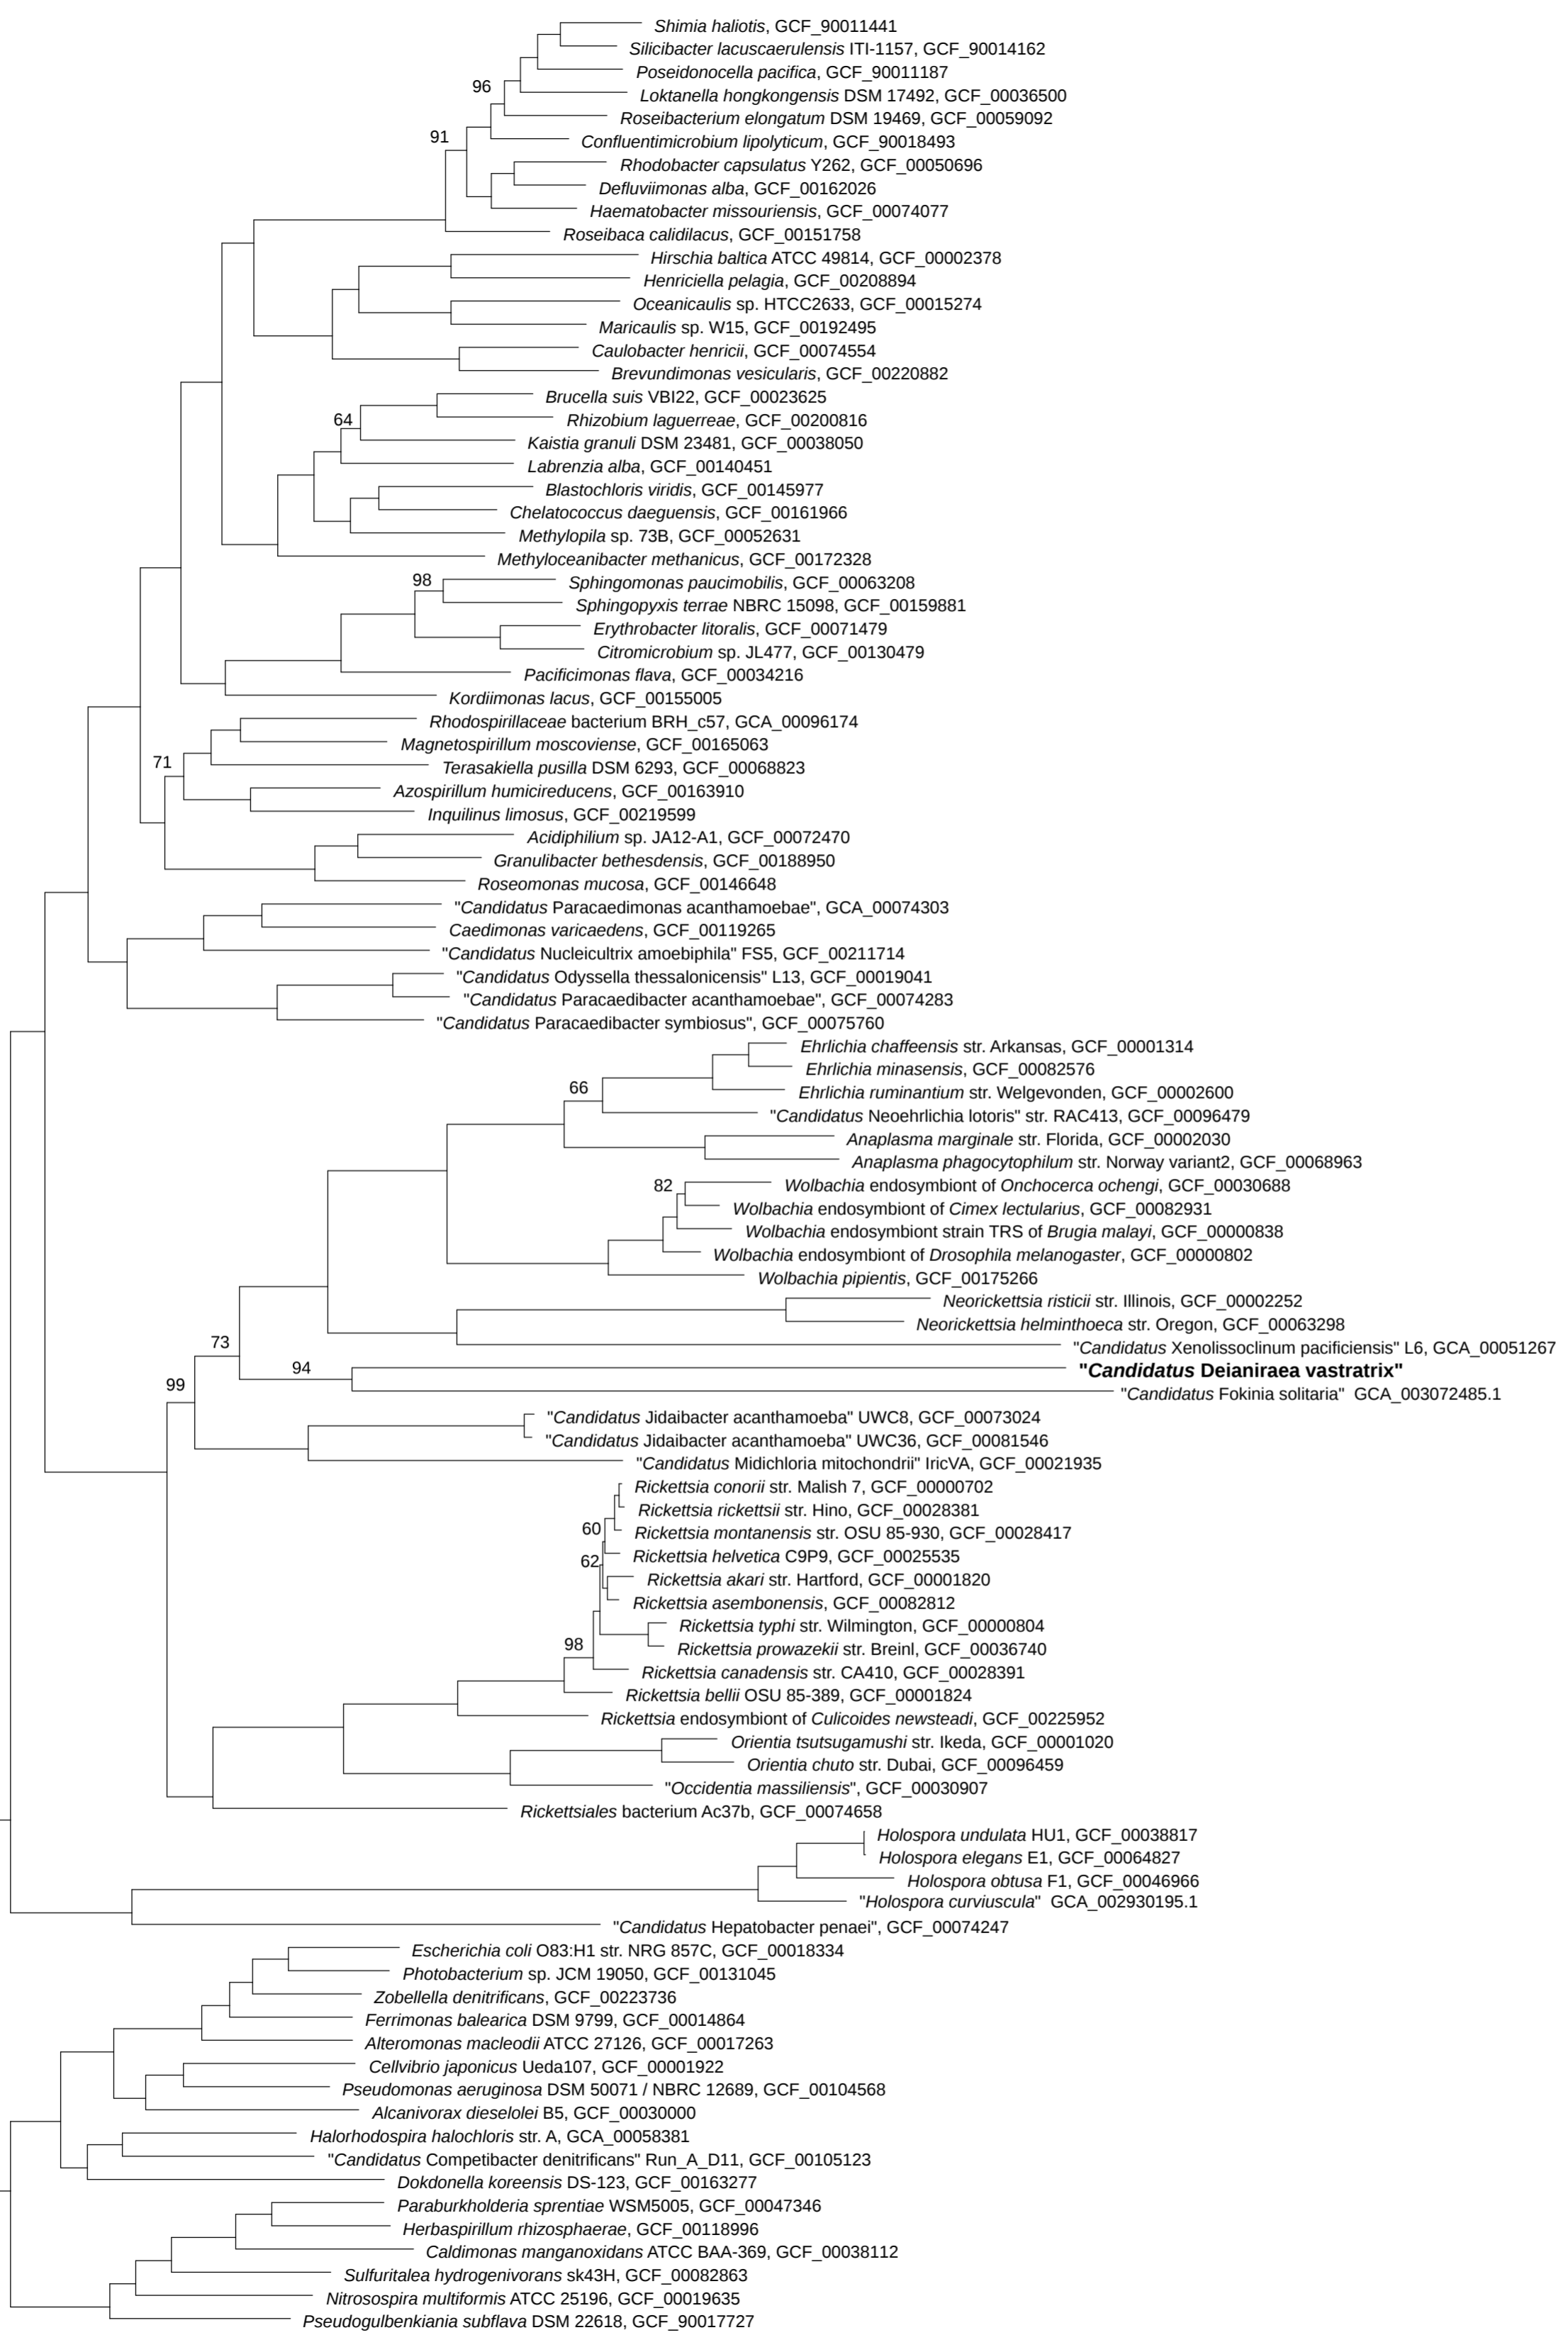

**other  
Alphaproteobacteria**

**Holosporales 1**

**Anaplasmataceae**

**"Ca. Deianiraeaceae"  
"Ca. Midichloriaceae" 1  
"Ca. Midichloriaceae" 2**

**Rickettsiales**

**Rickettsiaceae**

**Holosporales 2**

**Betaproteobacteria  
+  
Gammaproteobacteria  
(outgroup)**

**b**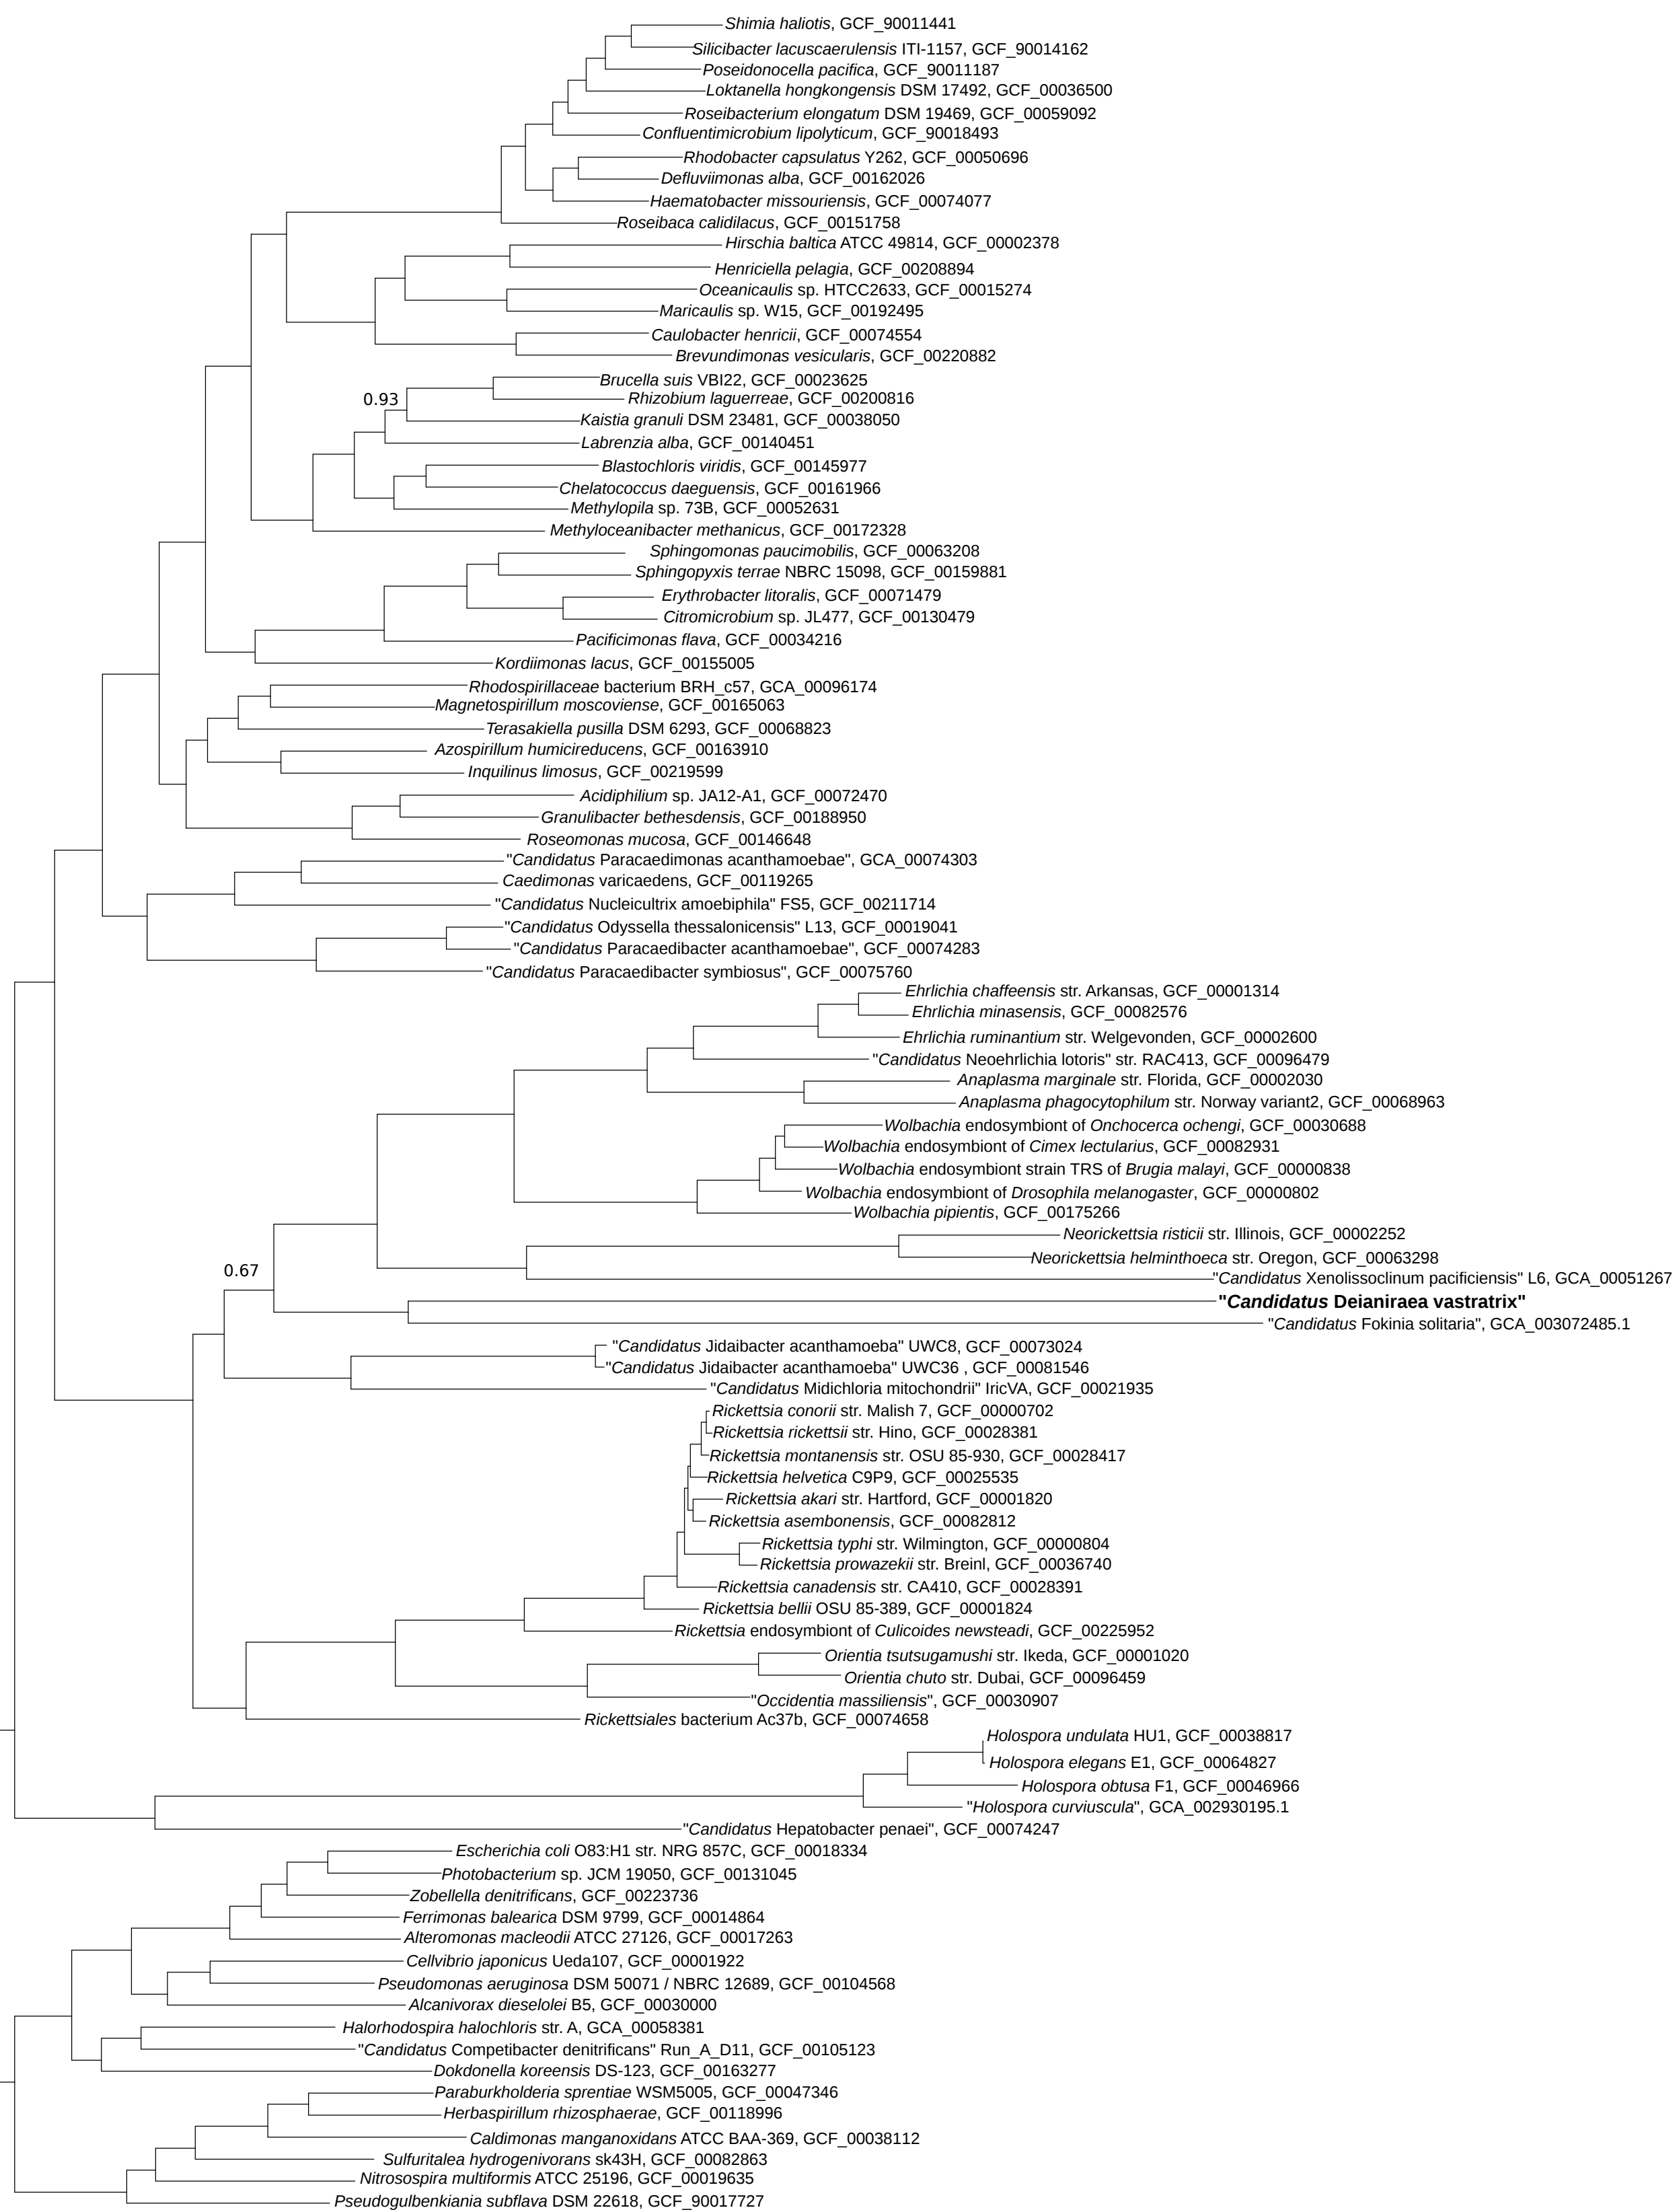

other  
**Alphaproteobacteria**

**Holosporales 1**

**Anaplasmataceae**

**"Ca. Deianiraeaceae"**  
**"Ca. Midichloriaceae" 1**  
**"Ca. Midichloriaceae" 2**

**Rickettsiales**

**Rickettsiaceae**

**Holosporales 2**

**Betaproteobacteria**  
 +  
**Gammaproteobacteria**  
 (outgroup)

**C**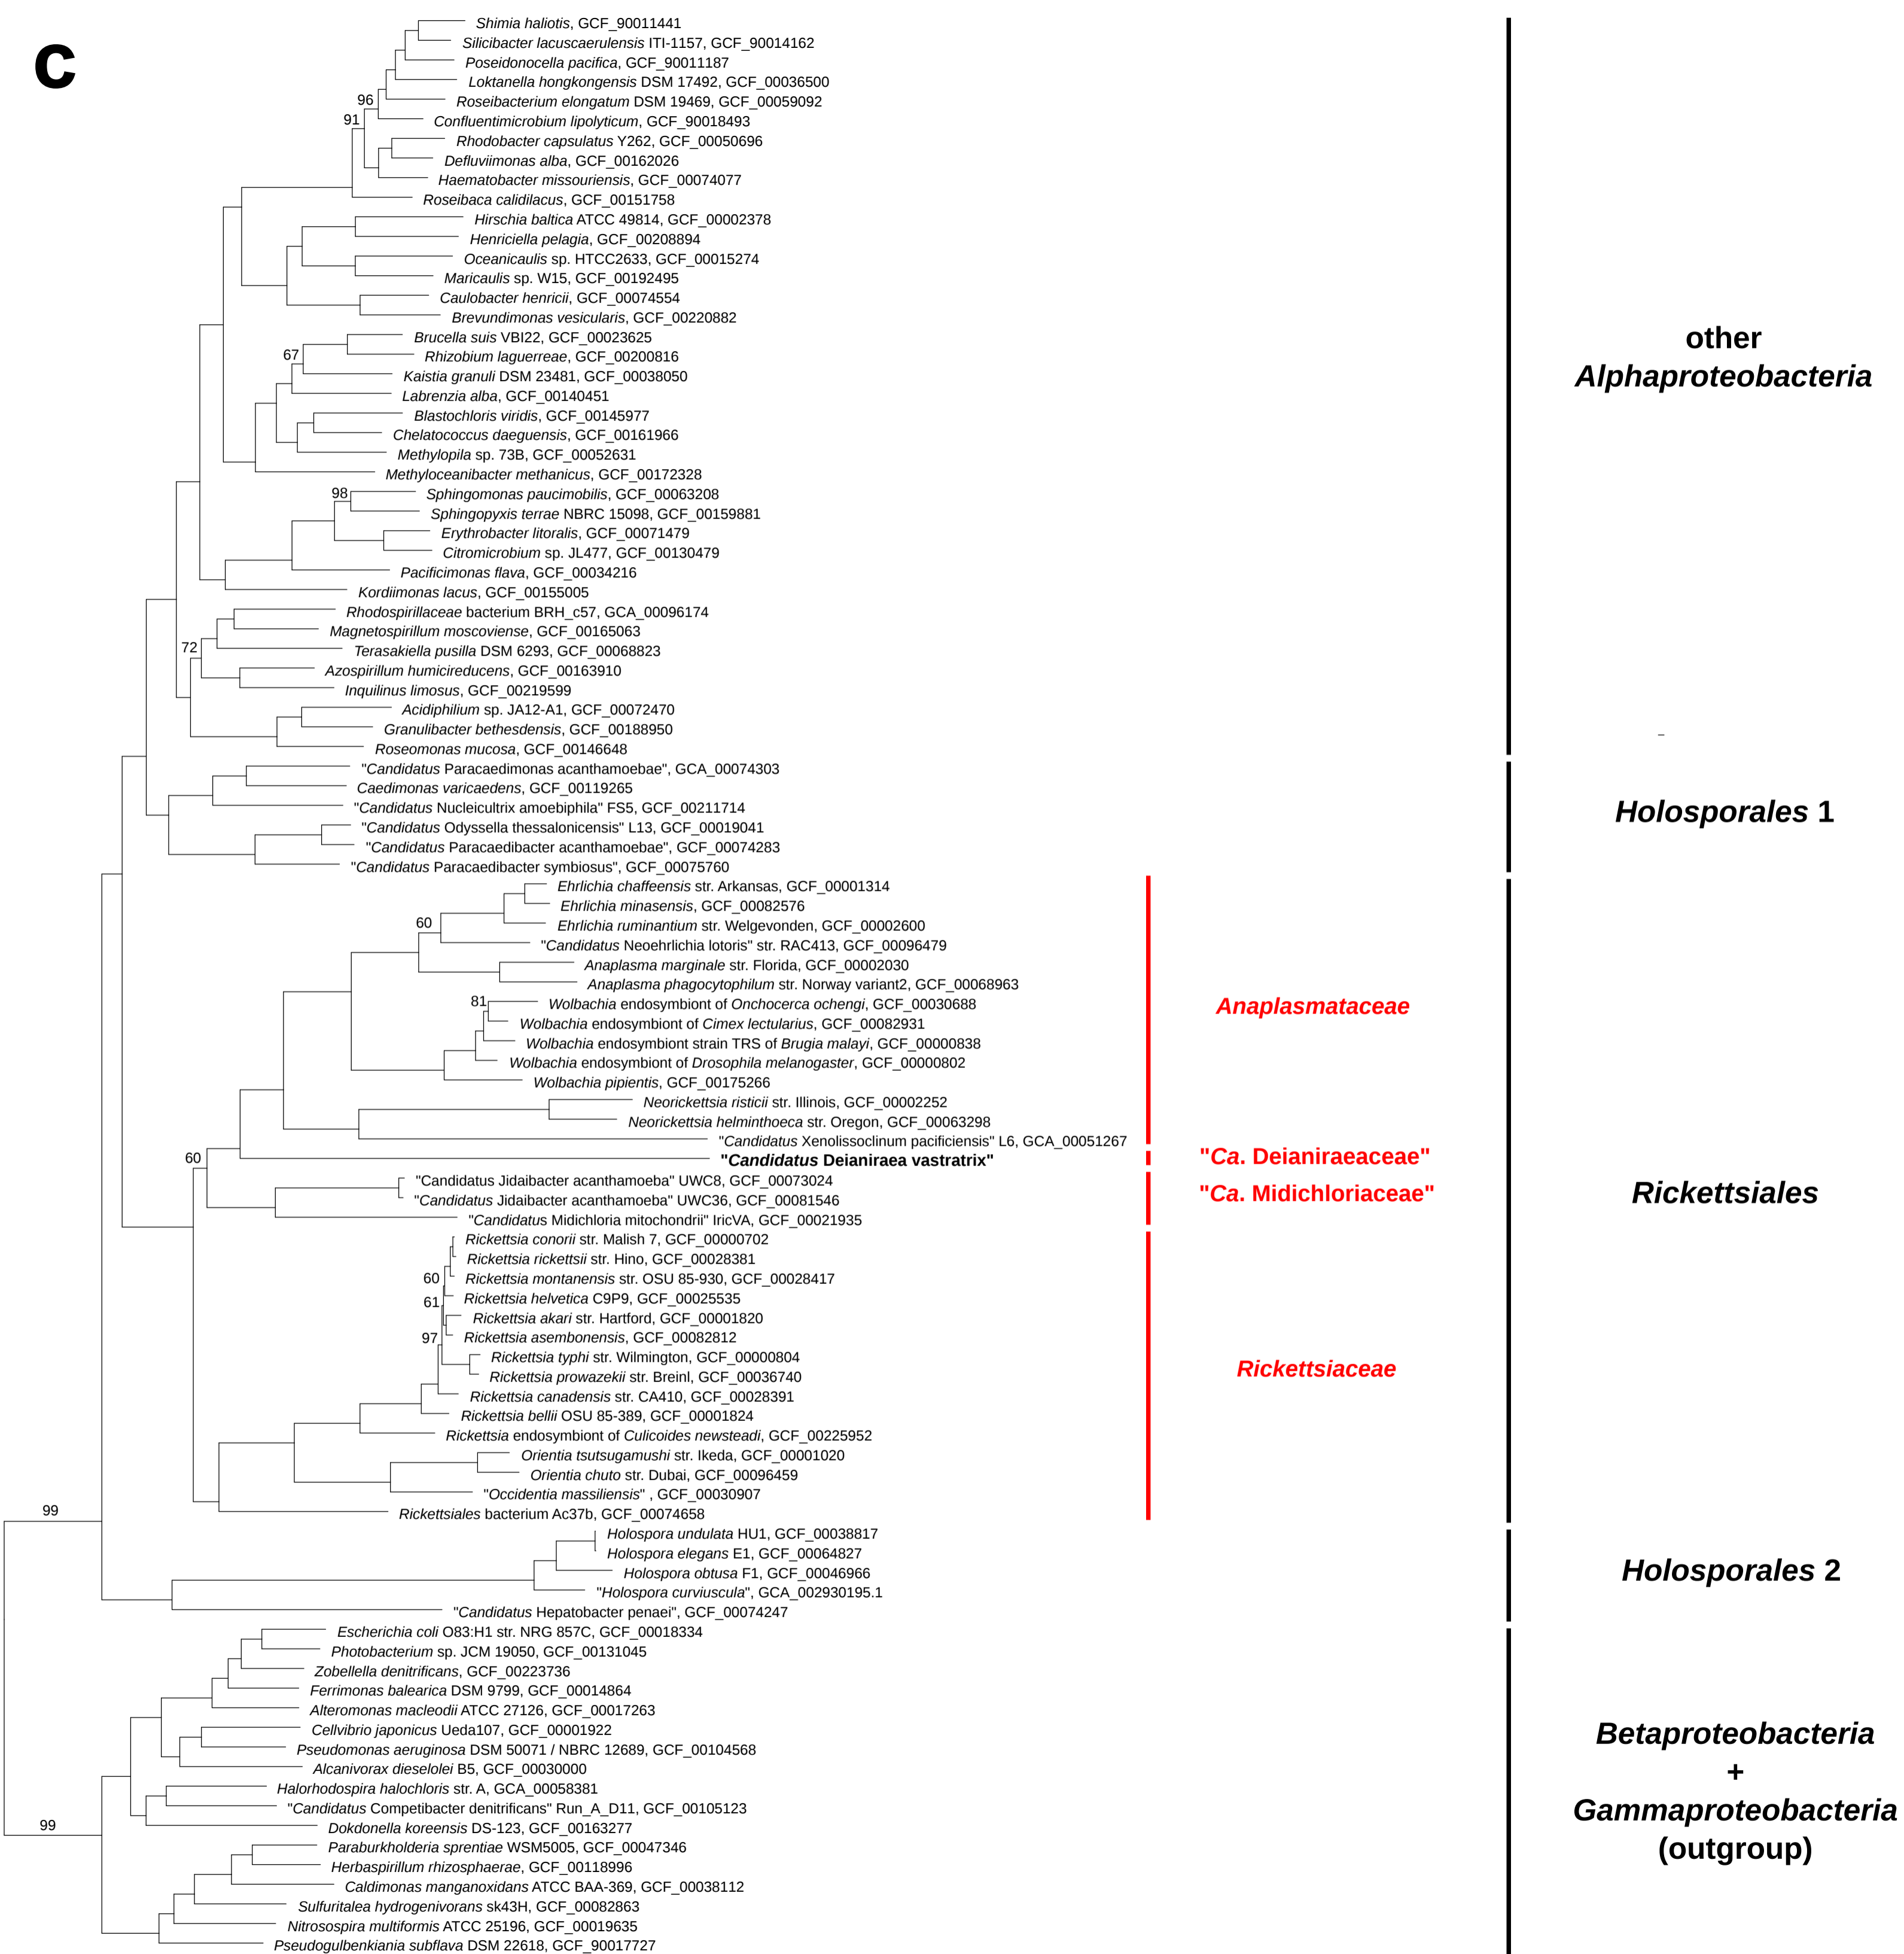

**d**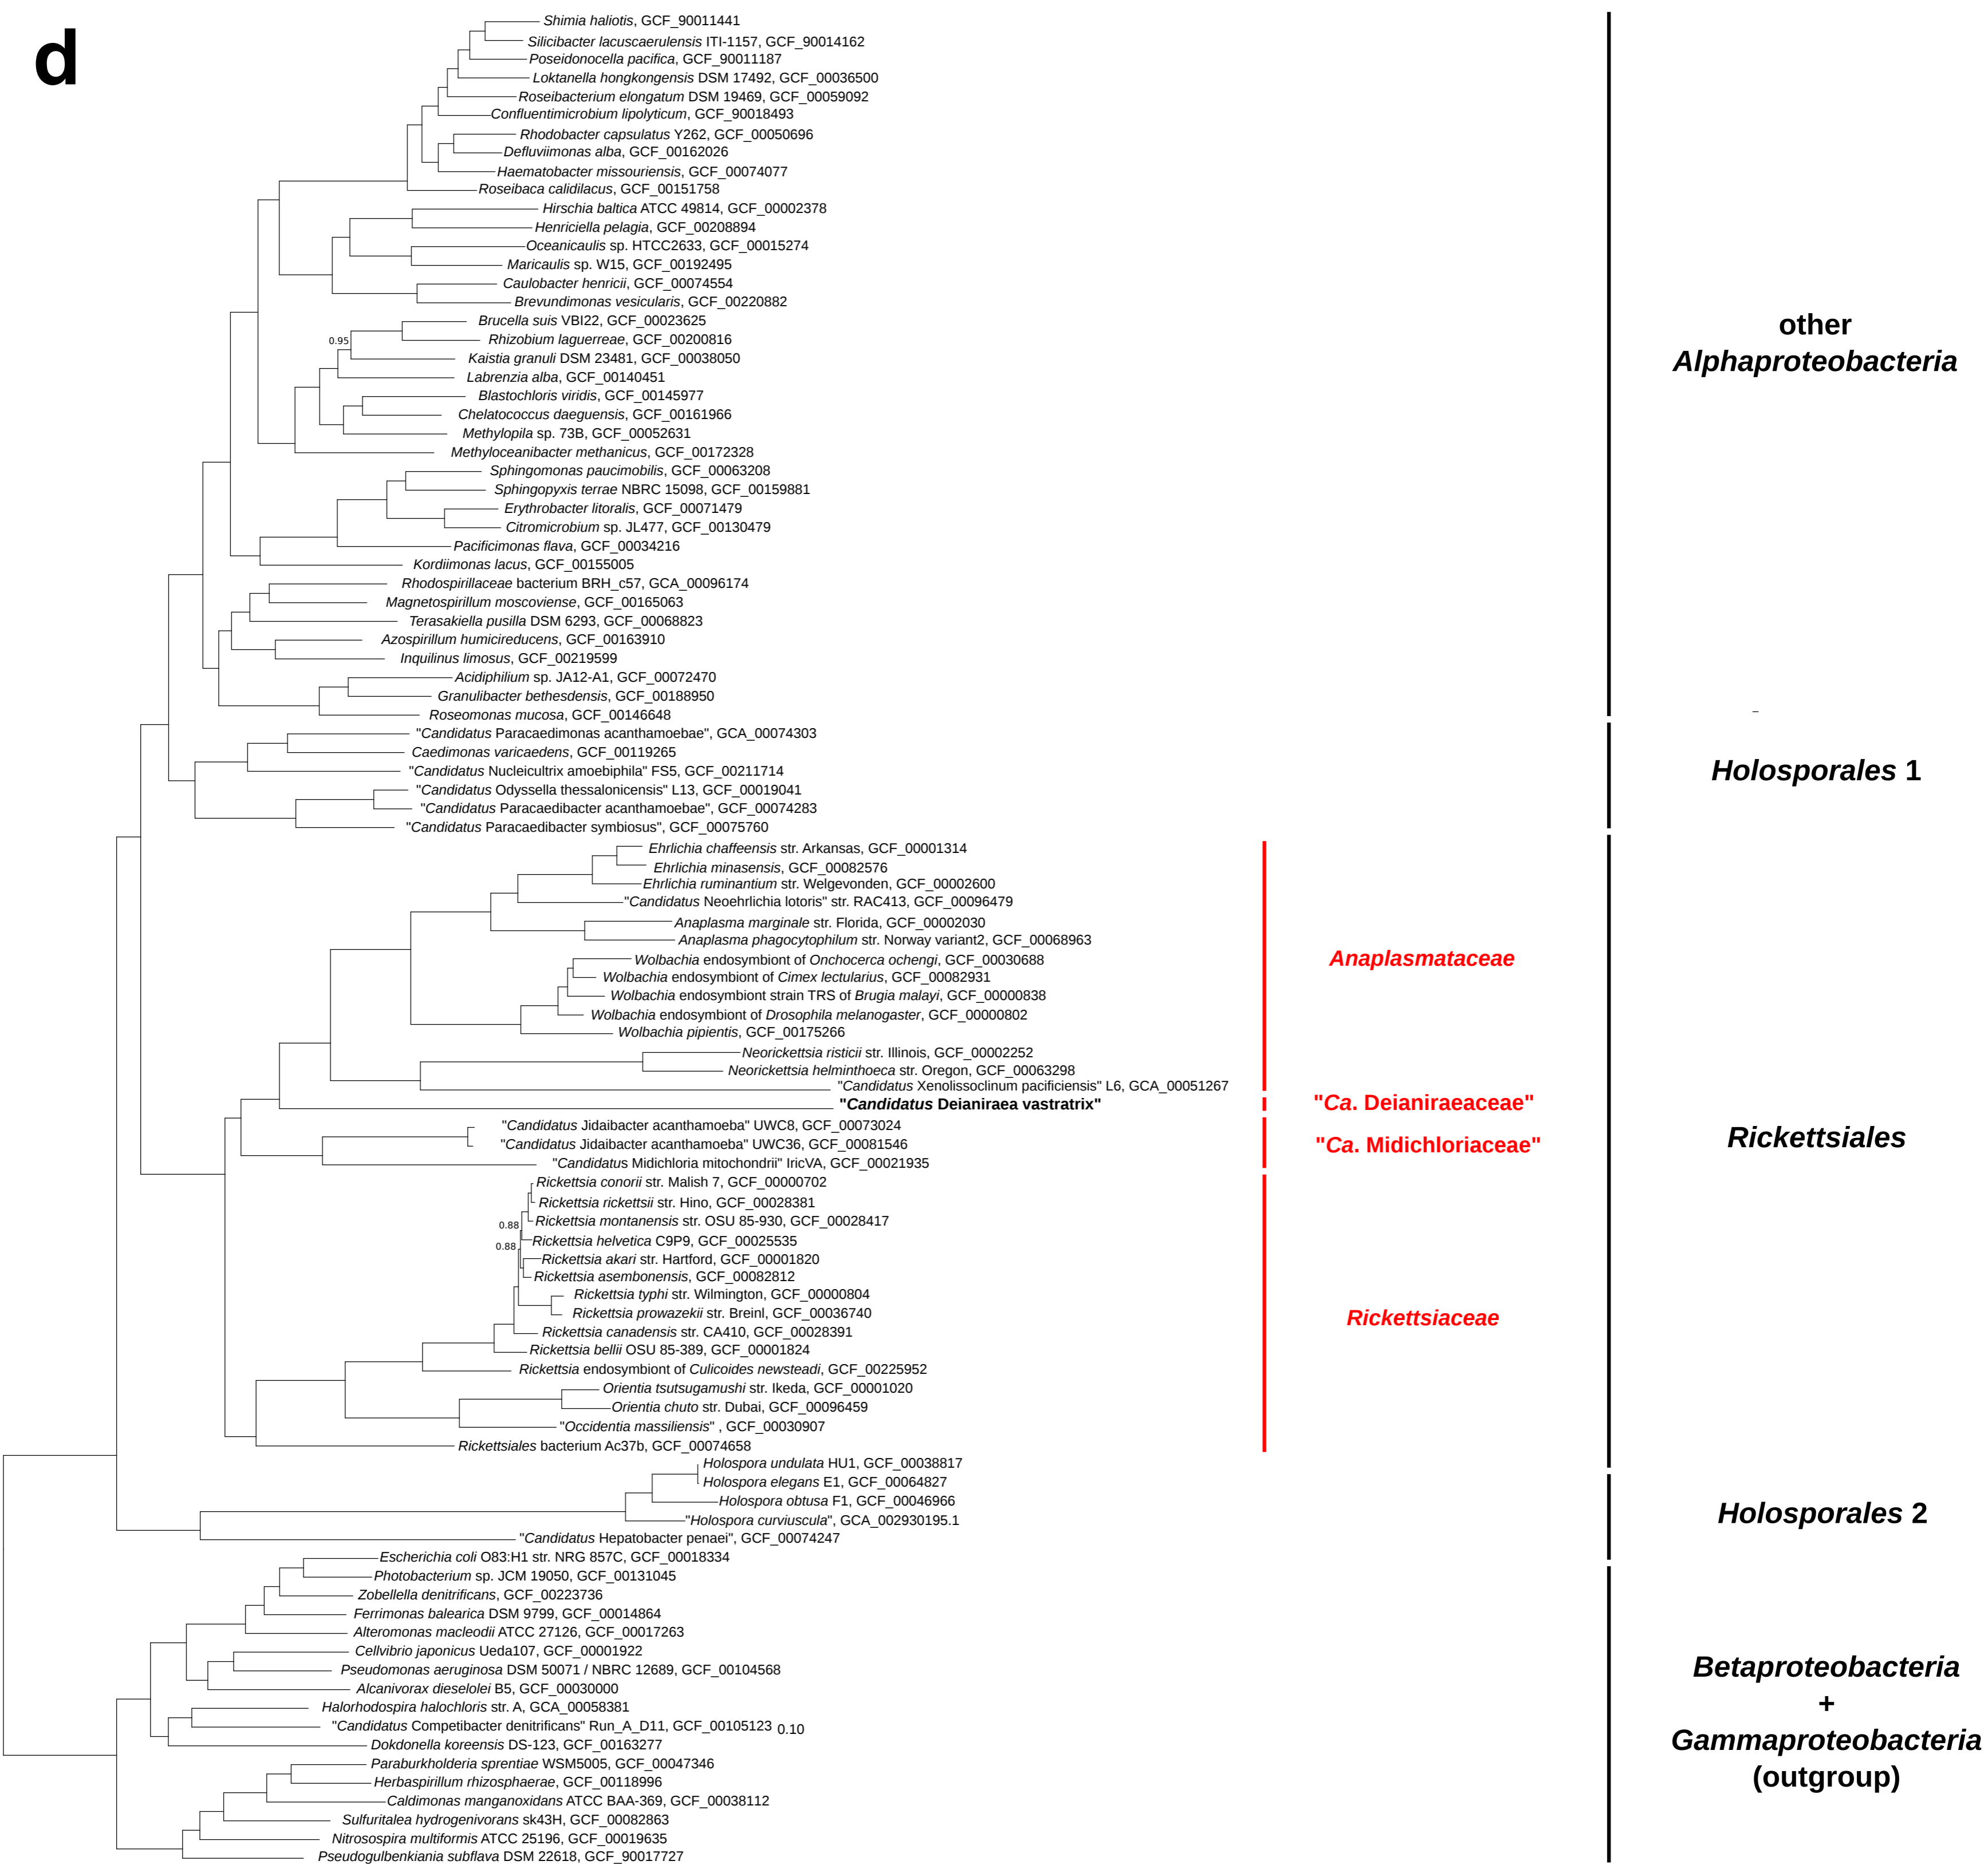

e

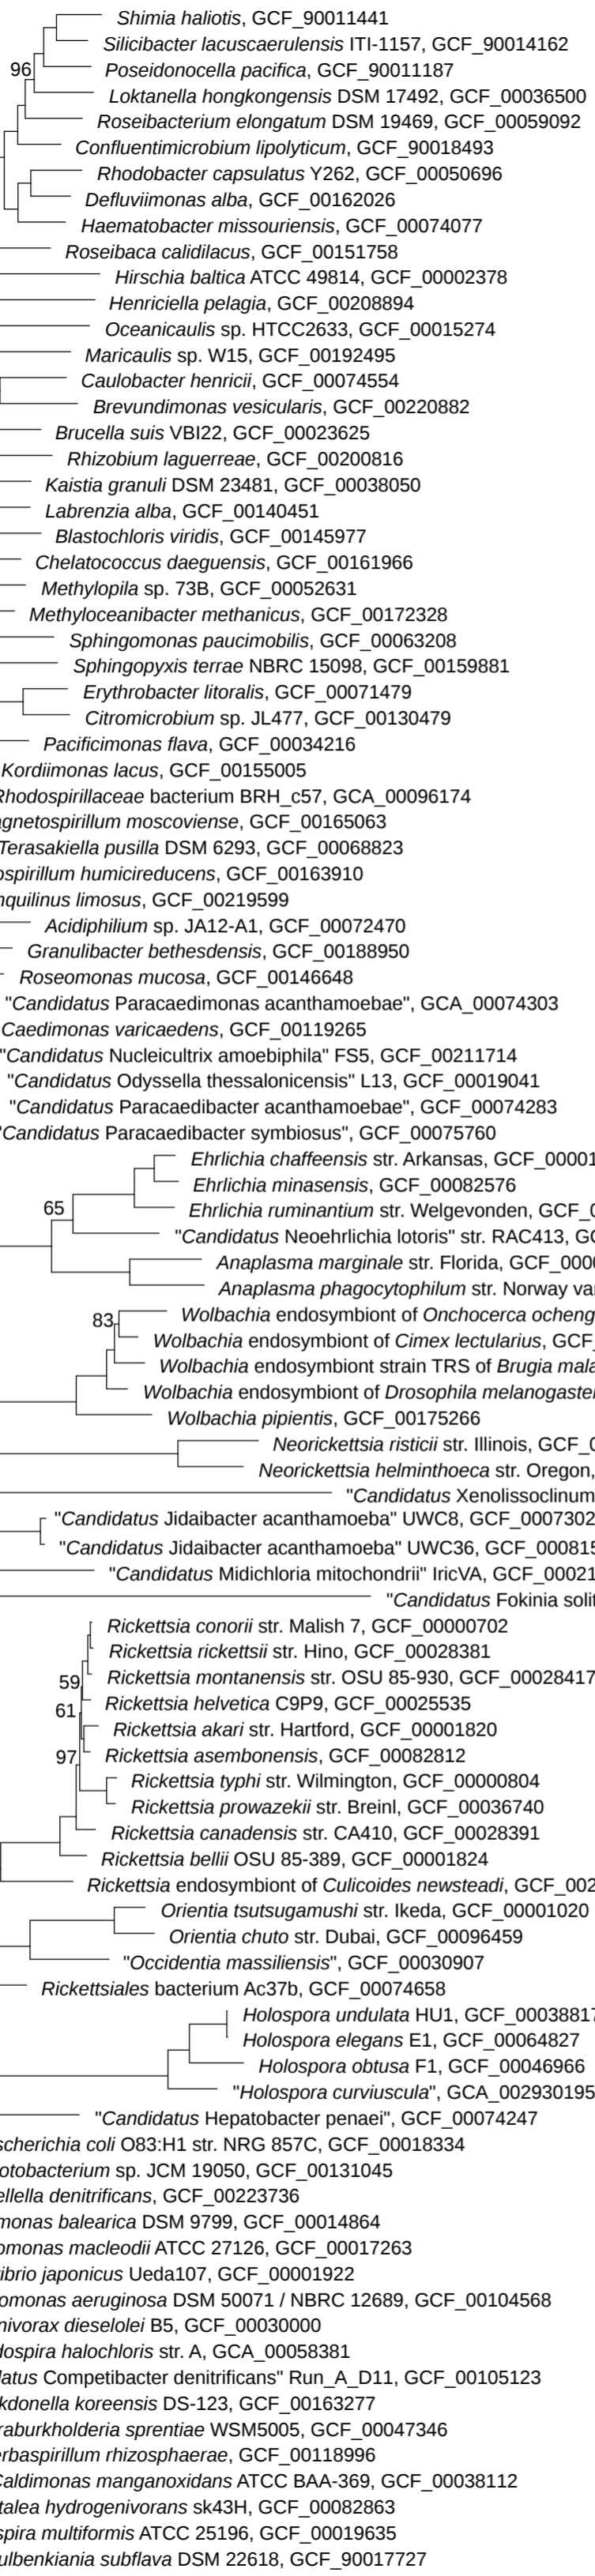

other  
**Alphaproteobacteria**

**Holosporales 1**

**Anaplasmataceae**

**"Ca. Midichloriaceae"**

**Rickettsiales**

**Rickettsiaceae**

**Holosporales 2**

**Betaproteobacteria**  
+  
**Gammaproteobacteria**  
(outgroup)

0.10

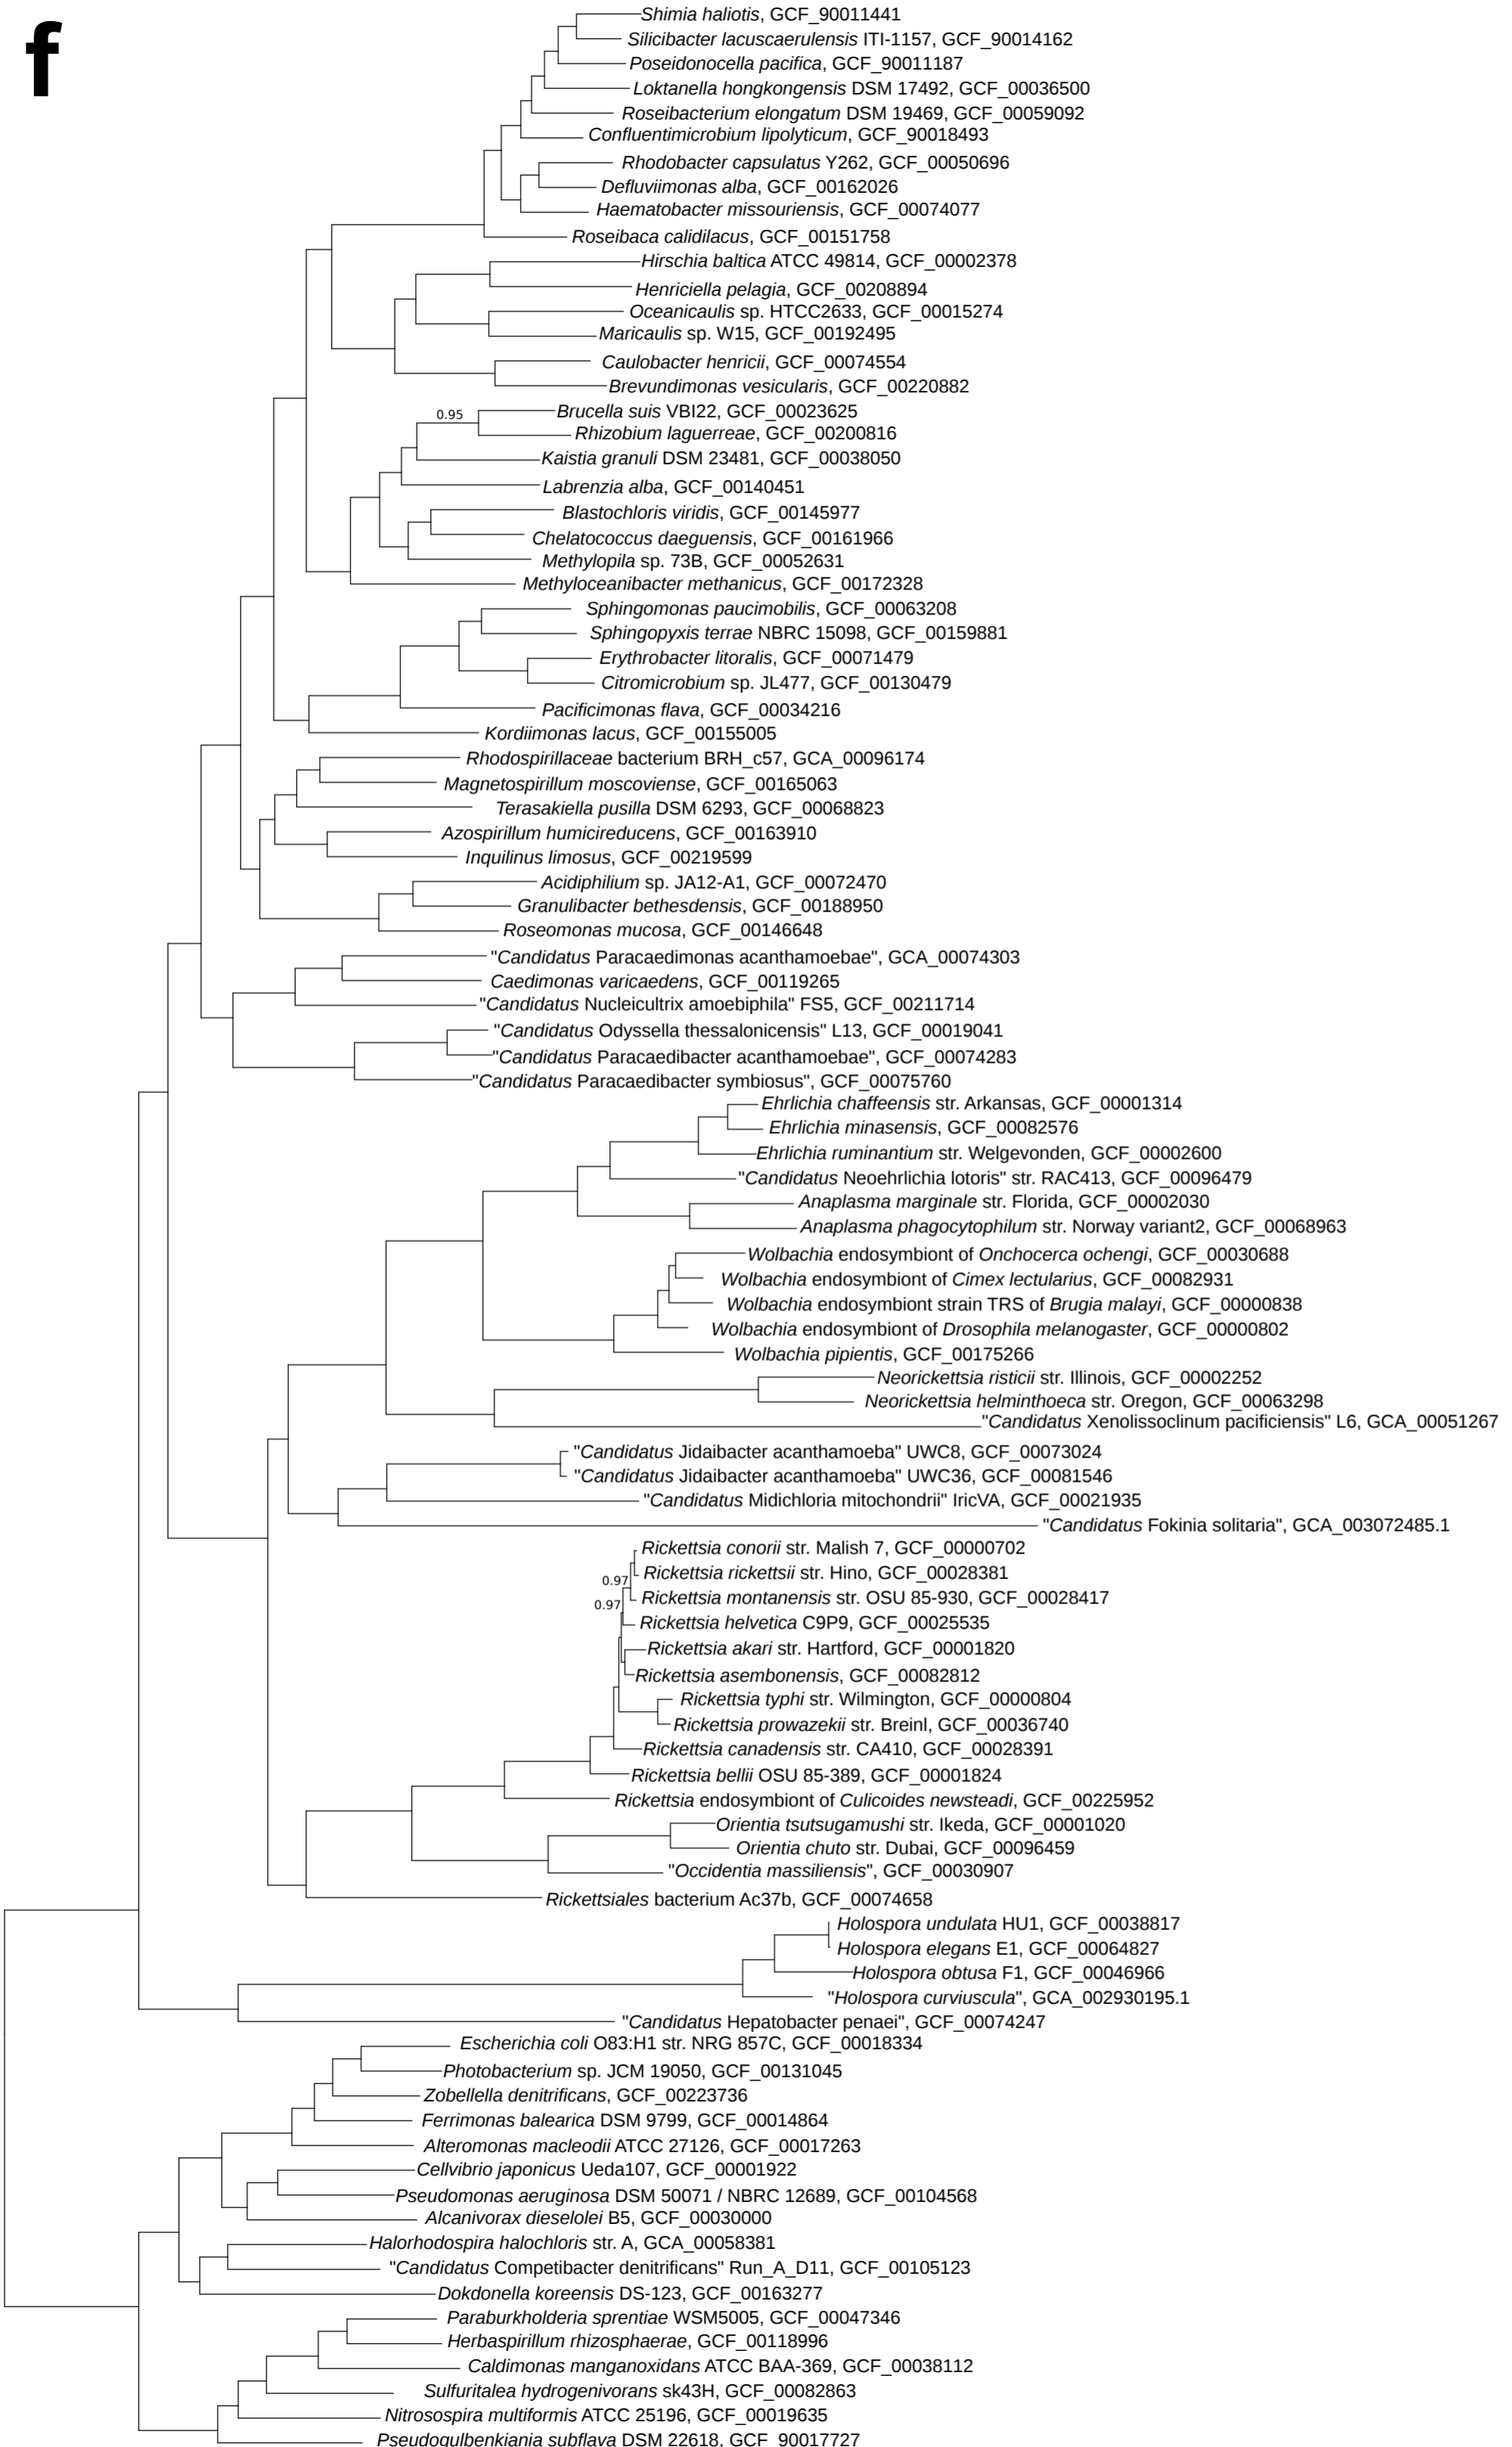

other  
**Alphaproteobacteria**

**Holosporales 1**

**Anaplasmataceae**

**"Ca. Midichloriaceae"**

**Rickettsiales**

**Rickettsiaceae**

**Holosporales 2**

**Betaproteobacteria**  
+  
**Gammaproteobacteria**  
(outgroup)
