# Supplementary material
Source: PubMed Central journal article supplement (PMC6776064)

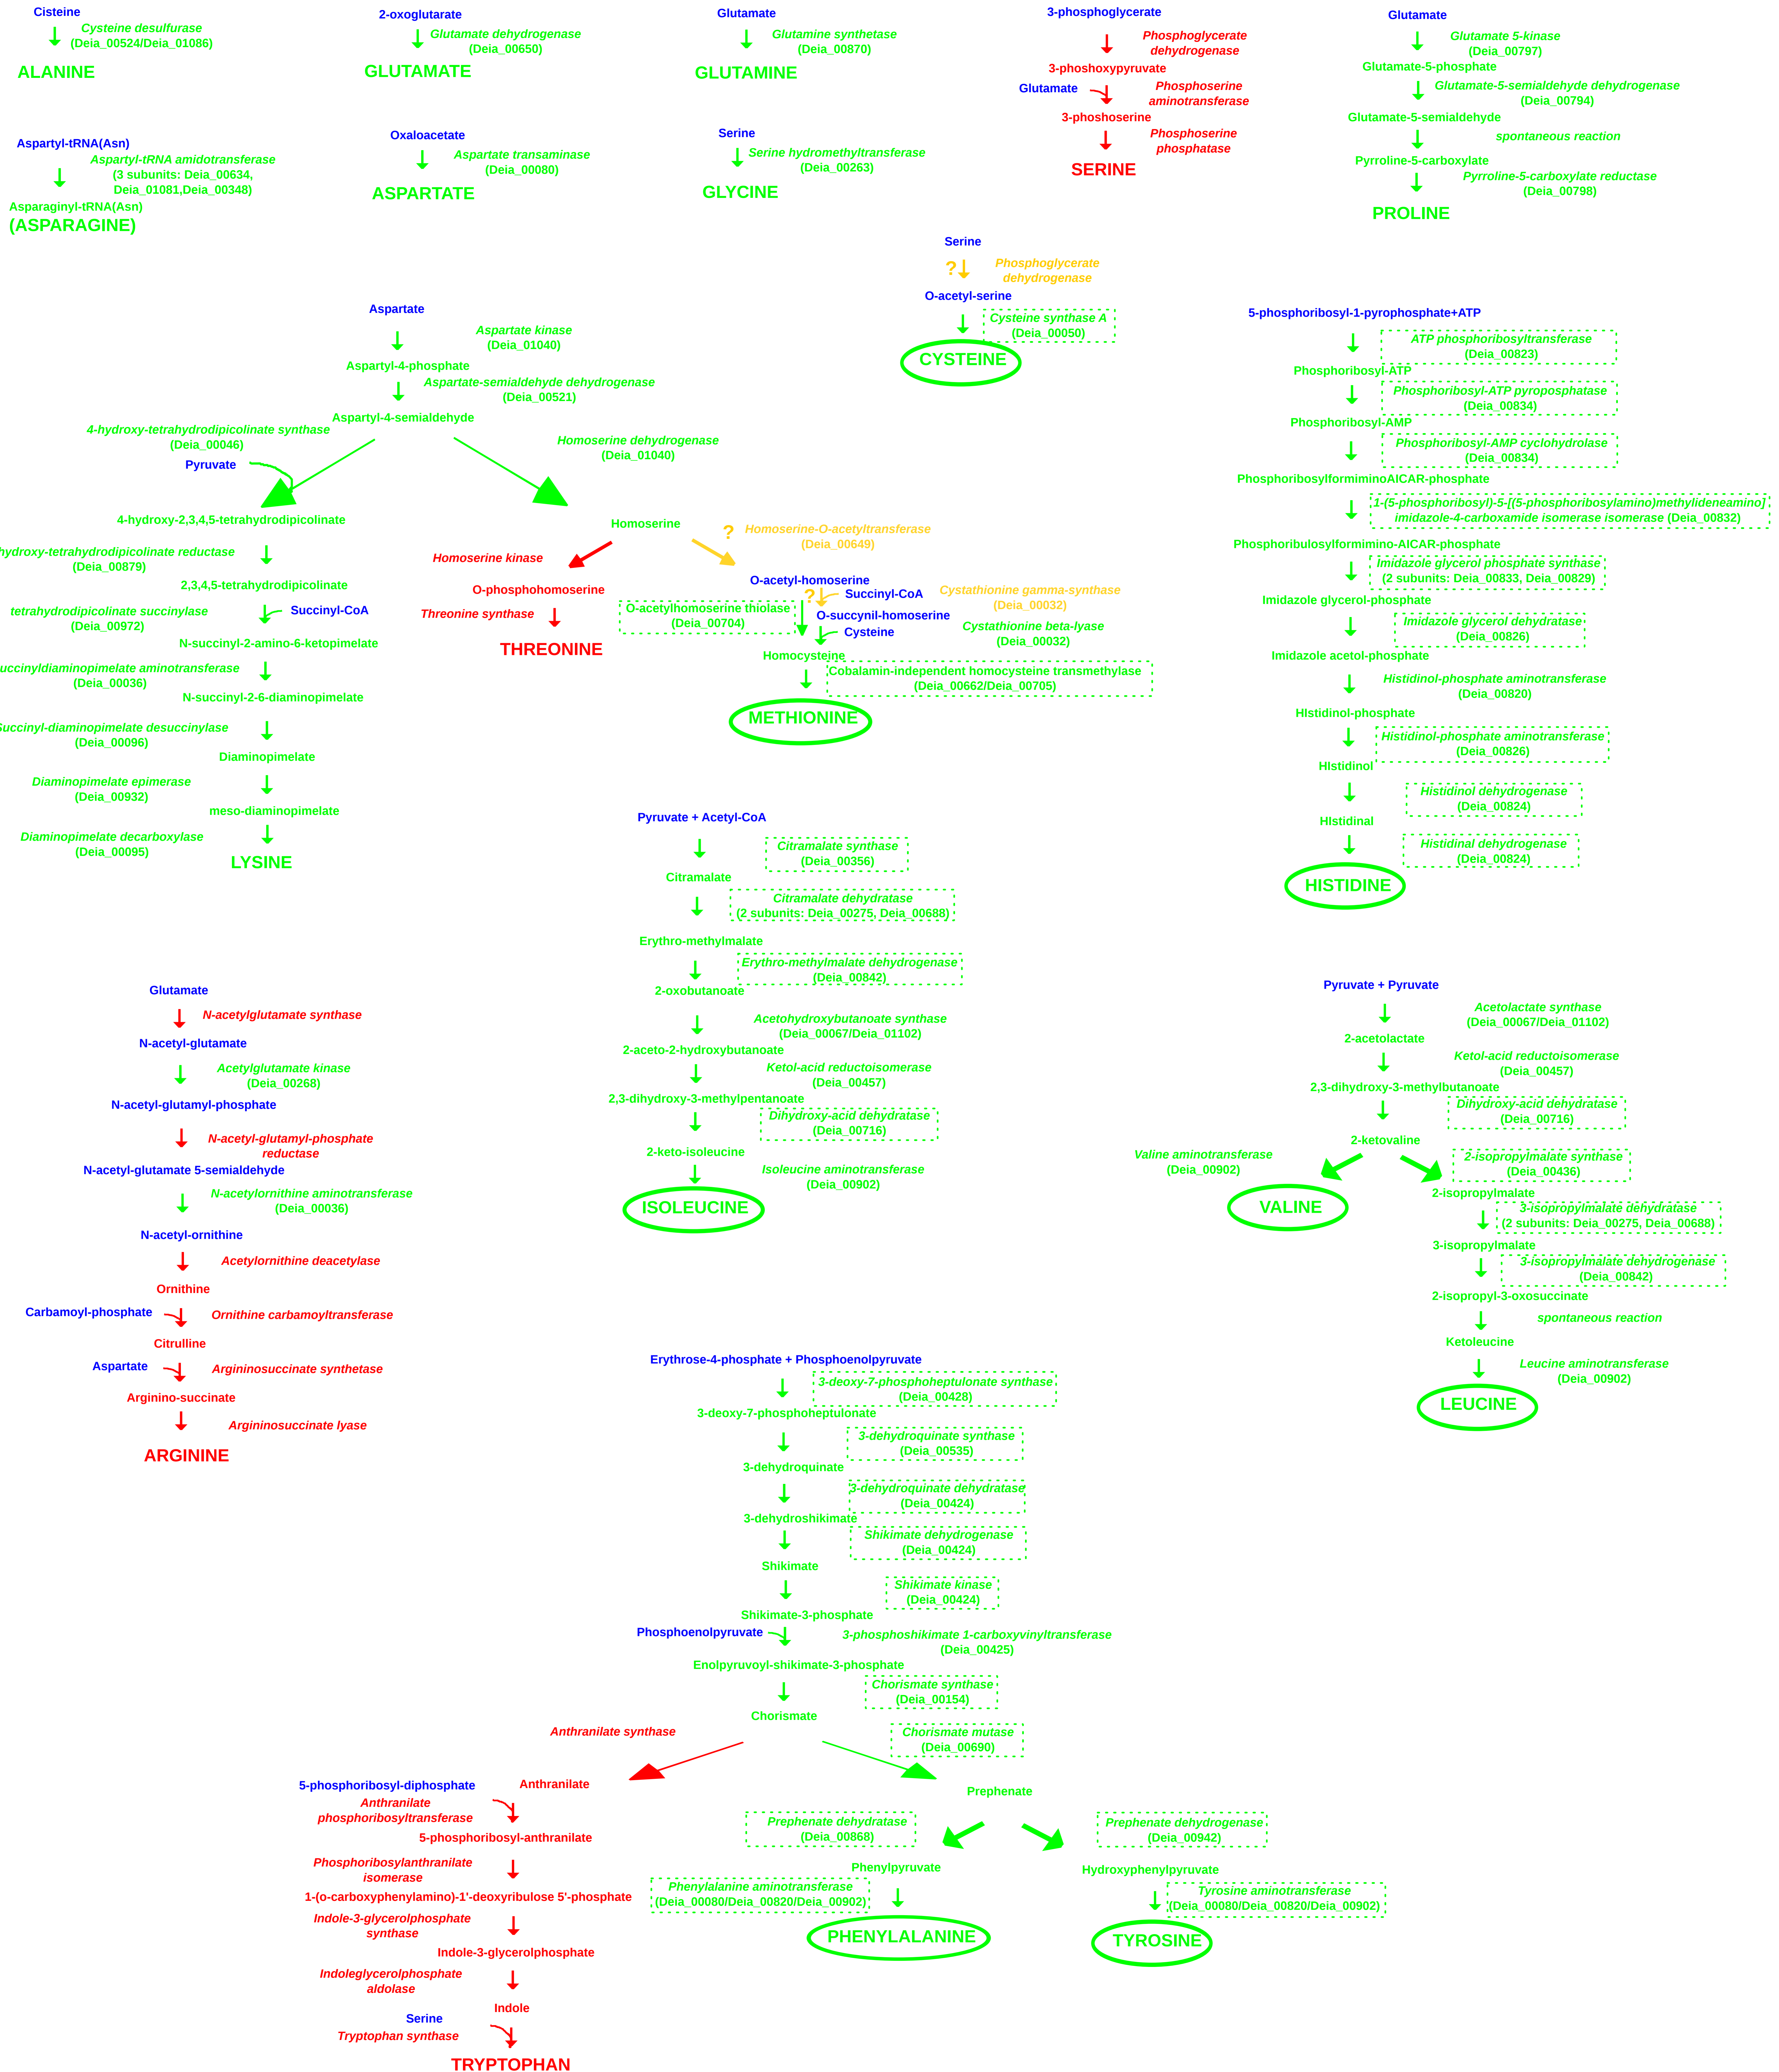

Supplement: 41396_2019_433_MOESM15_ESM.pdf [file 41396_2019_433_MOESM15_ESM.pdf]

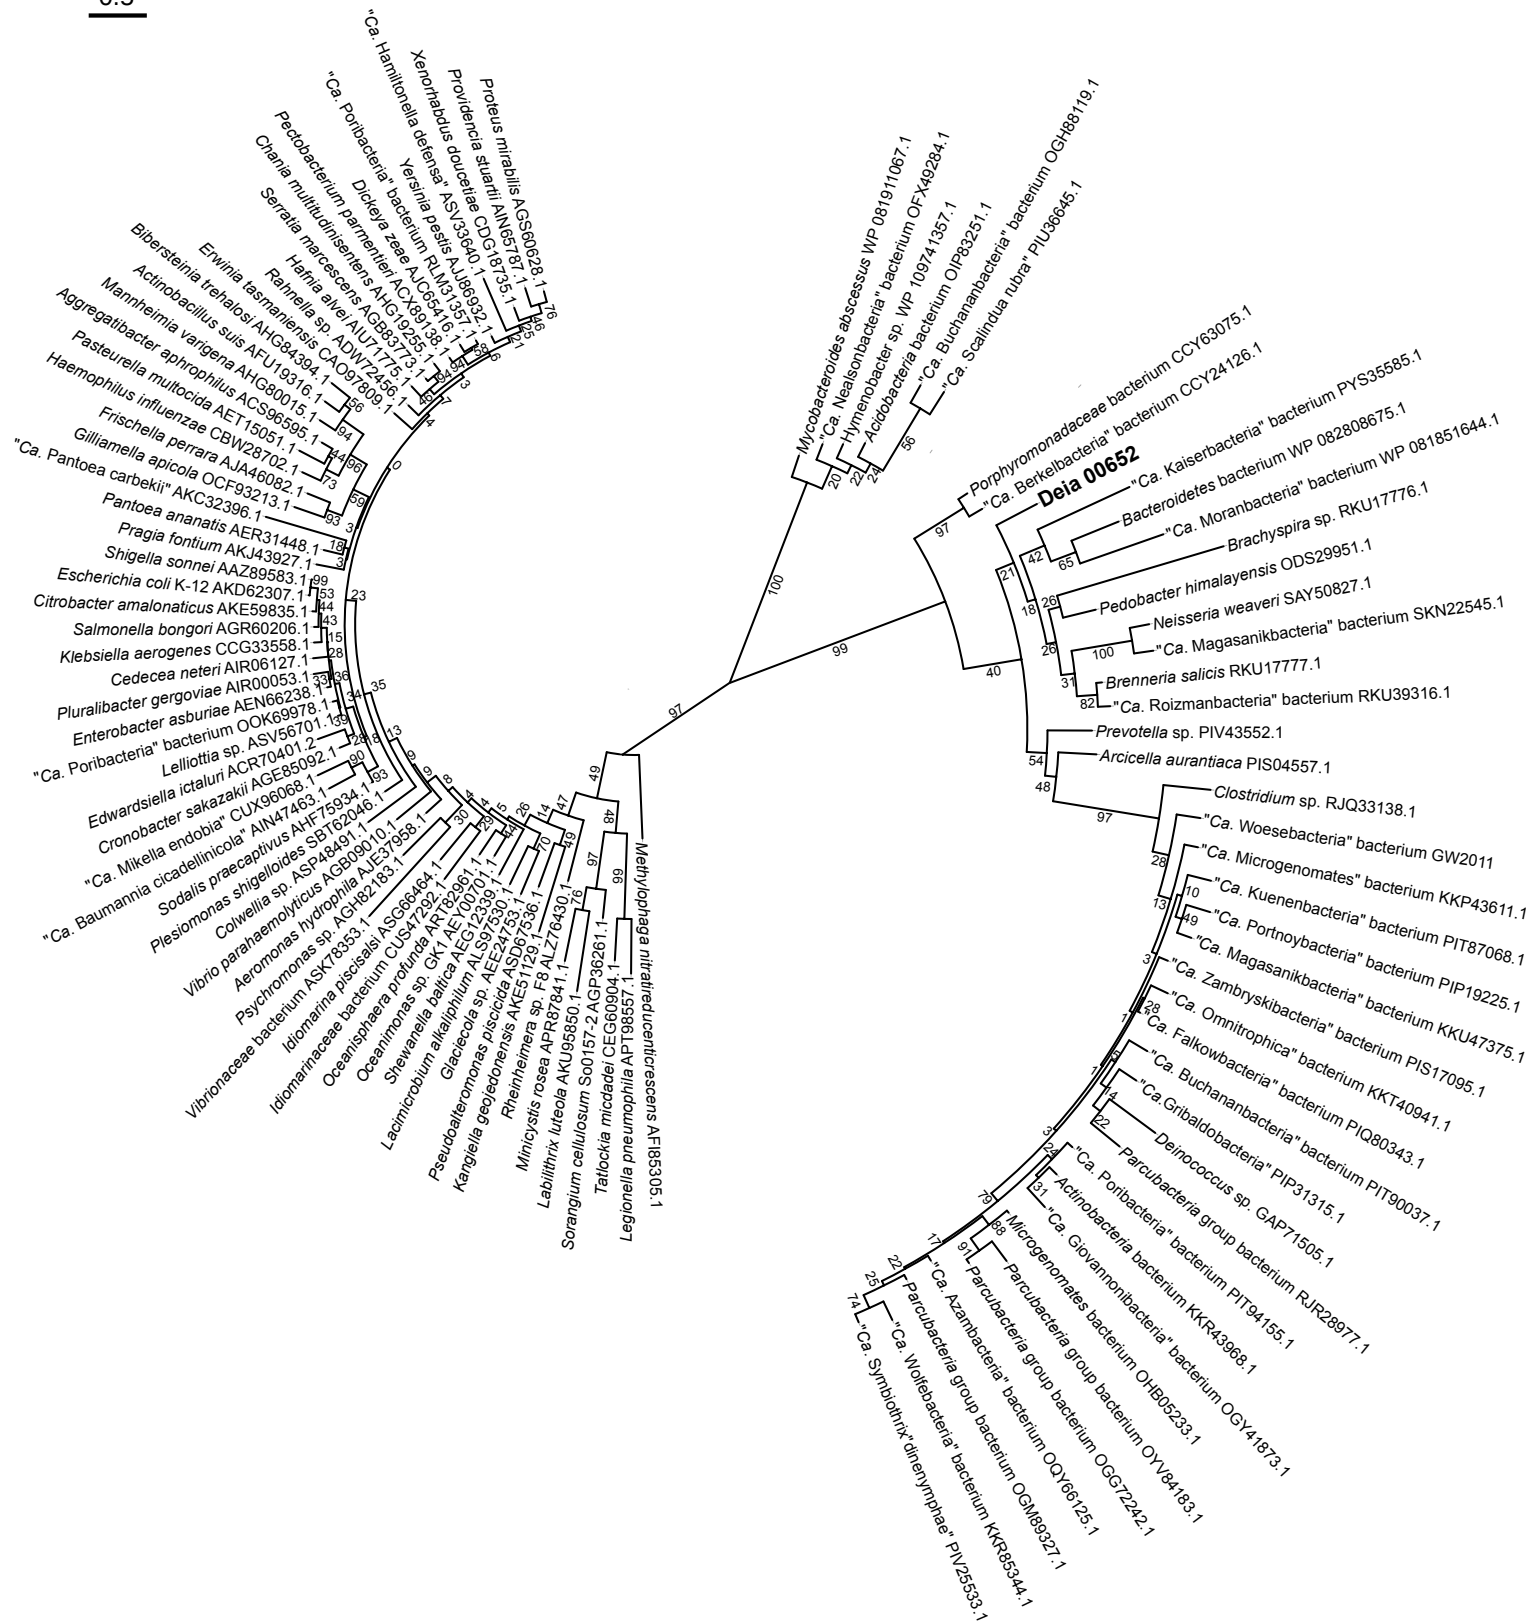

Supplement: 41396_2019_433_MOESM32_ESM.pdf [file 41396_2019_433_MOESM32_ESM.pdf]
